# Supplementary material for: Origin and evolution of plexins, semaphorins, and Met receptor tyrosine kinases
Source: PubMed Central journal article supplement (PMC6374515; doi:10.1038/s41598-019-38512-y), 2019-02-13

## **SUPPLEMENTARY MATERIAL**

### **Origin and evolution of plexins, semaphorins, and Met receptor tyrosine kinases**

Chrystian Junqueira Alves, Karla Yotoko, Hongyan Zou, Roland H. Friedel

#### **Supplemental data files**

##### **Table S1 protein source accession numbers.xlsx**

List of plexin, semaphorin, Met, and Met-LP sequences compiled for this study, including source databases, accession numbers, and editing notes.

##### **File S1 sequences.zip**

ZIP file containing sequence files of all proteins that were compiled for this study in GenPept format (\*.gp). Sequence files also contain information about annotated domain features.

##### **File S2 infile.zip**

ZIP file of Nexus alignment file (.nex file type) of Sema plus PSI domain of all Sema domain containing proteins.

##### **File S3 all\_complete.zip**

ZIP file of phylogenetic tree of all Sema domain containing proteins (.tre file type). Source file for the tree representations shown in Fig. 5-7.

## Supplemental figure legends

### Figure S1. Alignment of human and choanoflagellate plexins

Alignment of human and choanoflagellate plexins was calculated using MUSCLE ([www.ebi.ac.uk/Tools/msa/muscle](http://www.ebi.ac.uk/Tools/msa/muscle); default settings) and visualized using Jalview ([www.jalview.org](http://www.jalview.org)). Predicted protein domains are indicated below the alignment.

Hsapi, *H. sapiens*; Mbrev, *M. brevicollis*; Srose, *S. rosetta*.

### Figure S2. Secondary structure prediction of Sema domain of choanoflagellate plexin

JPred secondary structure prediction of Sema domain of Plexin-1 of choanoflagellate *M. brevicollis*. Green arrows predict beta-strands, red boxes alpha-helices. The seven blades of the Sema domain can be recognized by the beta-strand pattern. The first beta-strand, marked as (7), is part of blade 7. Two extrusions, between blade 1 and 2 and inside blade 5, are recognizable by the presence of alpha-helices.

### Figure S3. Alignments of Sema domains of choanoflagellate and human plexins and semaphorins

Alignments of human and choanoflagellate Sema plus PSI domains of plexins (A) and semaphorins (B) were created with MUSCLE. Colored arrows indicate predicted beta-strands of the seven blades of the Sema domain; gray boxes indicate extrusions 1 and 2. Conservation track indicates: “\*”, fully conserved amino acids (aa); “.”, conservation of aa with strongly similar properties; “.”, conservation of aa with weakly similar properties. Conserved cysteines of the Sema domains are highlighted in yellow (Cys1-8). Further annotations are derived from structural data of mouse Sema6A and Plexin-A2 (Nogi et al., 2010). Amino acids that are predicted to take part in Plexin-A / Sema6 binding are bolded and also indicated by black dots.

### Figure S4. Gene duplication model based on plexin phylogenetic tree

A) Representation of the most accepted phylogenetic tree of the taxa under study. Below each taxon, the plexin, Met, and Met-LP sequences found in each genome are indicated. Those sequences contained in monophyletic clades in a taxon were represented as only one gene group. We numbered the genes from the base to the tips of the gene phylogeny (see Fig. 6) and searched for the minimum number of duplications sufficient to explain the number of sequences found in each taxon. TK, tyrosine kinase domain.

B) Topology of the phylogenetic hypothesis inferred for plexins, Mets, and Met-LPs (related to Fig. 6) with numbers of hypothetical ancestral genes indicated at internal nodes of the tree. The red branches indicate the sequences assigned as descendants of gene 1, which originated in an ancestor of Choanoflagellida and Metazoa. The green branches indicate sequences assigned as descendants of genes 2 - 5, which originated in non-bilaterian organisms. Purple branches indicate sequences assigned to genes 6 – 10 that originated in Protostomia. The blue branches indicate the sequences assigned to gene 11 that originated in Deuterostomia.

**Figure S5. Gene duplication model based on semaphorin phylogenetic tree**

A) Representation of the most accepted phylogenetic tree of the taxa under study. Below each taxon, the semaphorins found in each genome are indicated. Those sequences contained in a monophyletic clade in a taxon were represented as only one gene group. We numbered the genes from the base to the tips of the gene phylogeny (see Fig. 7) and searched for the minimum number of duplications that are sufficient to explain the number of sequences found in each taxon. FN, fibronectin type III domain; TH, thrombospondin type 1 domain; IG, immunoglobulin-like domain.

B) Topology of the phylogenetic hypothesis inferred for semaphorin sequences (related to Fig. 7) with the gene numbers indicated at internal nodes of the tree. The red branches indicate the sequences assigned as descendants from gene 1, which originated in an ancestor of Choanoflagellida and Metazoa. The green branches indicate sequences assigned to genes 2 - 6, which originated in non-bilaterian organisms. The purple branches indicate sequences assigned to genes 7 and 8 that originated in Protostomia. The blue branches indicate the sequences assigned to genes 9, 10, and 11 that originated in Deuterostomia.

# Fig. S1 Alignment of human and choanoflagellate plexins

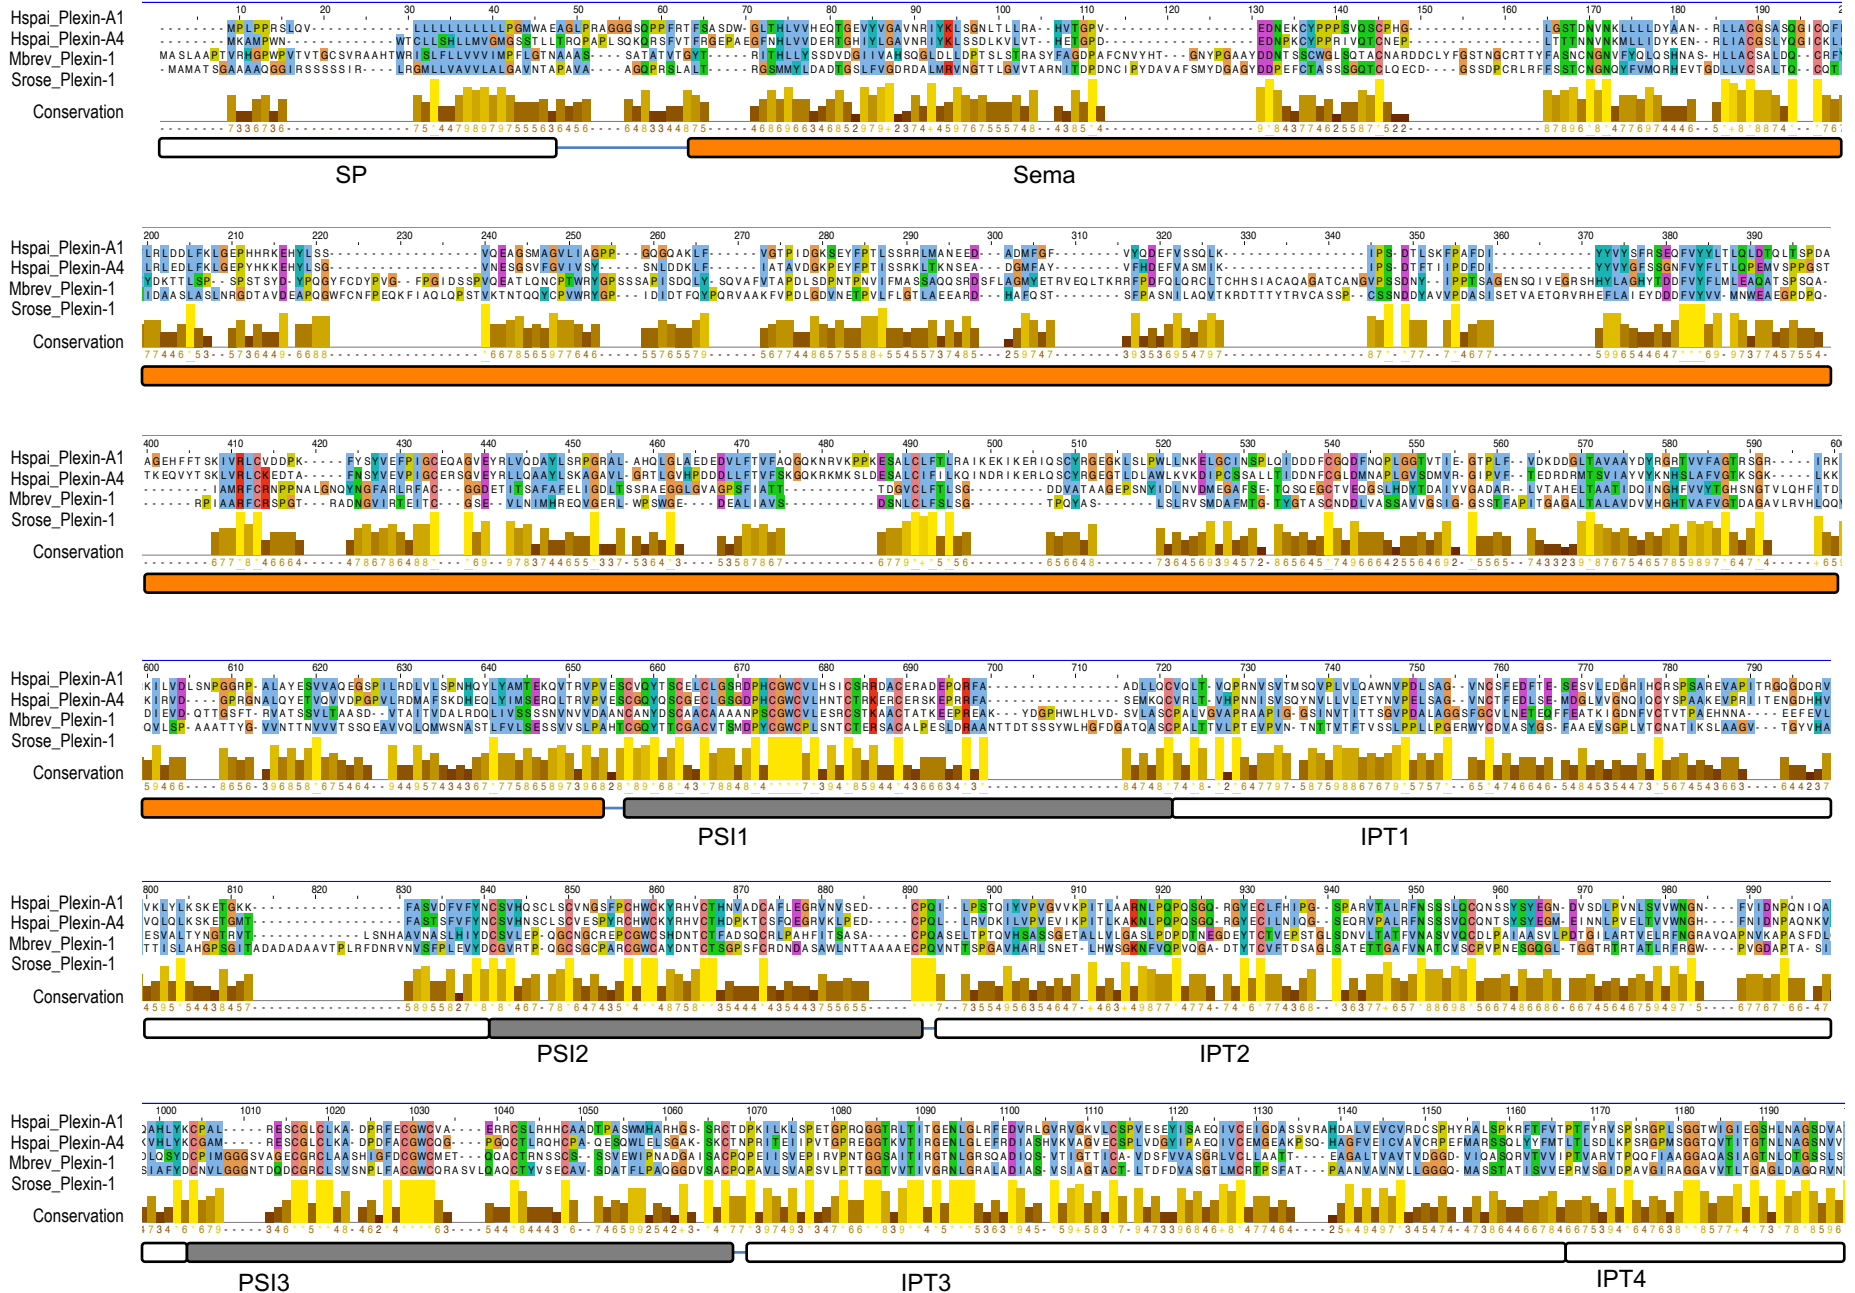

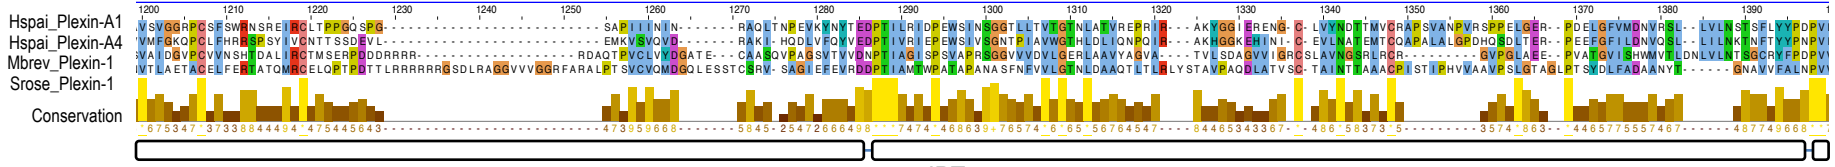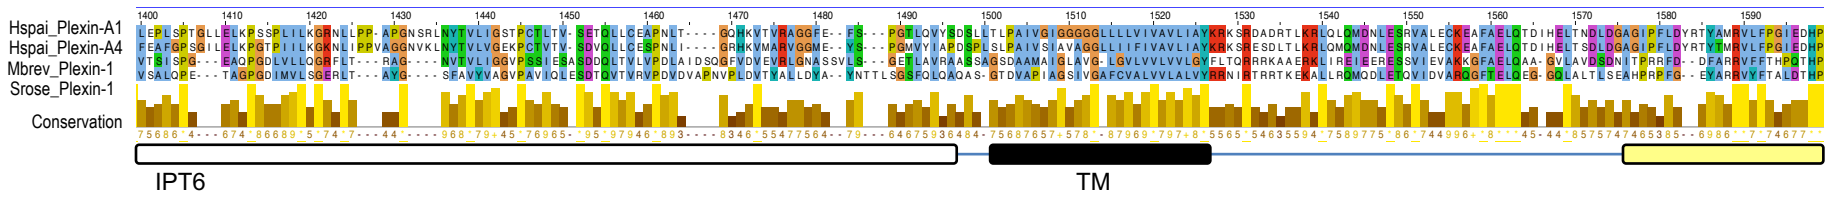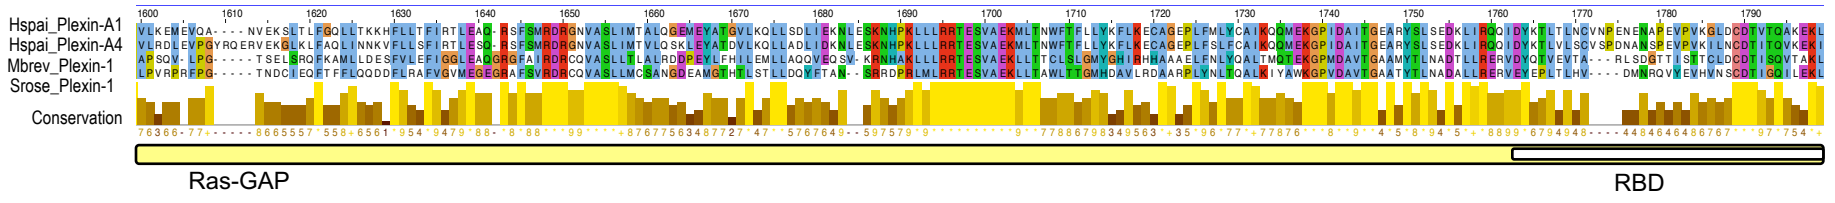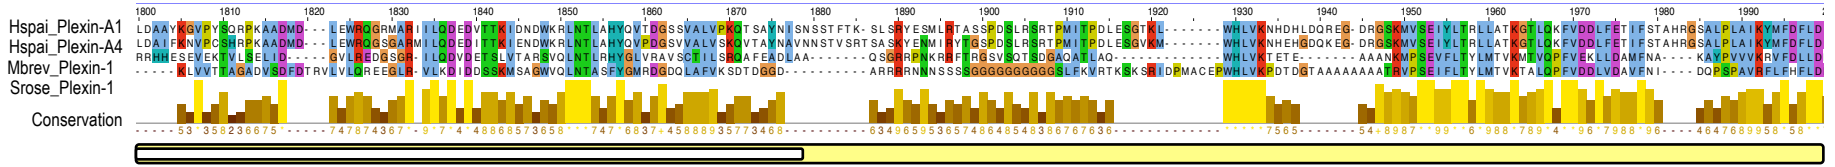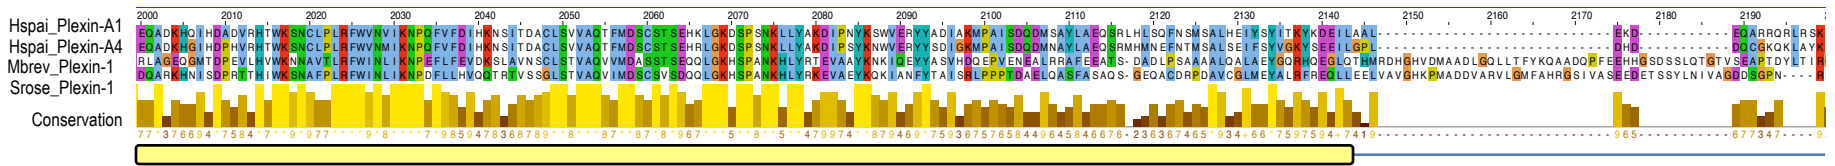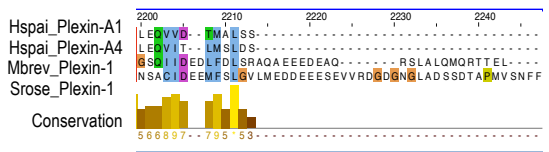



**Fig. S3** Alignments of Sema of choanoflagellate and human plexins and semaphorins

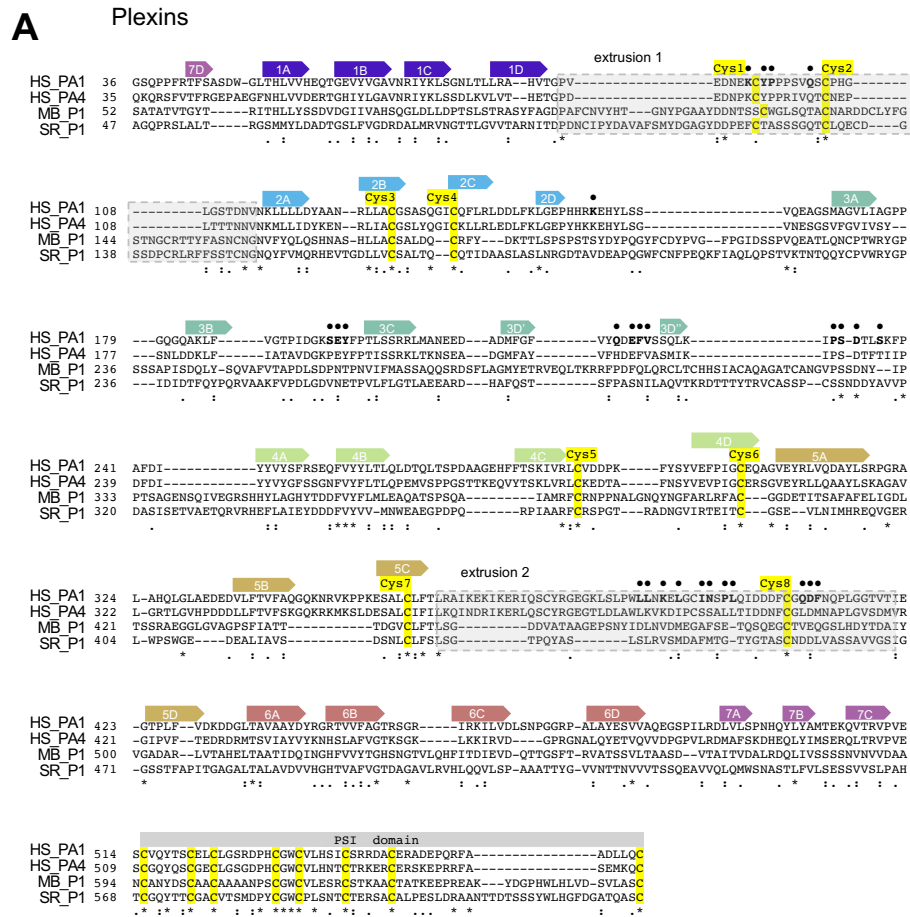

HS *Homo sapiens*  
 MB *Monosiga brevicollis*  
 SR *Salpingoeca rosetta*

PA1 Plexin-A1  
 PA4 Plexin-A4  
 P1 Plexin-1

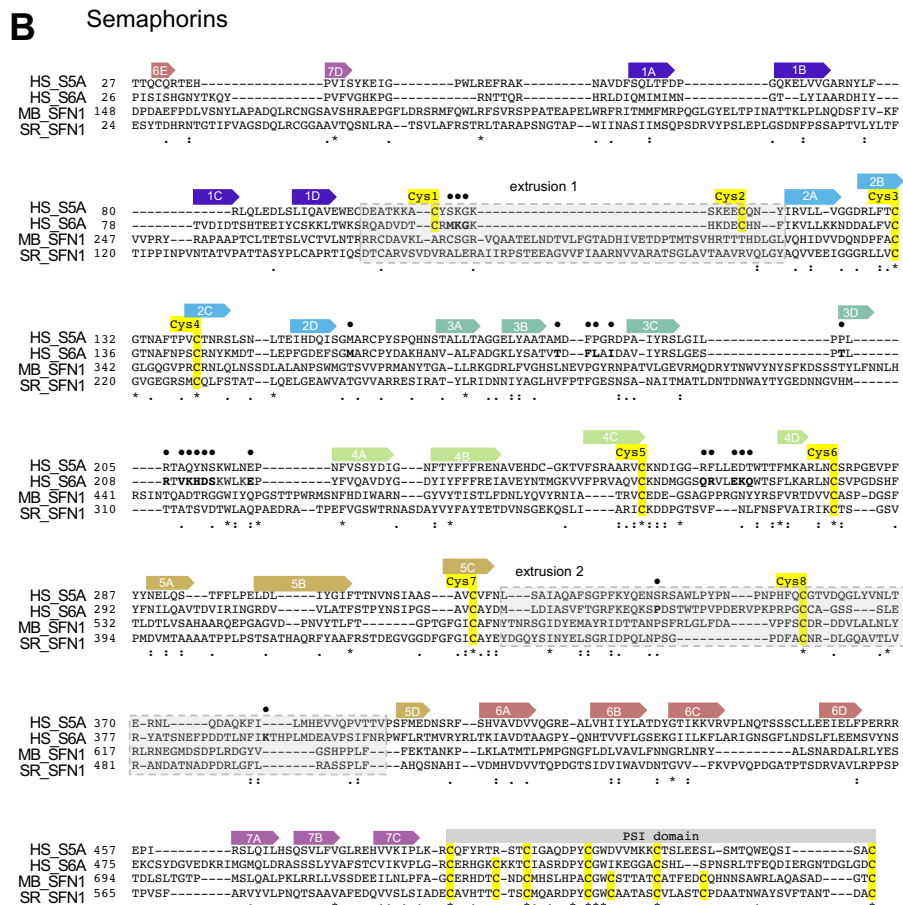

S5A Sema5A  
 S6A Sema6A  
 SFN1 Sema-FN1

**Fig. S4 A** Model of major gene duplication events in evolution of plexins and Met RTKs

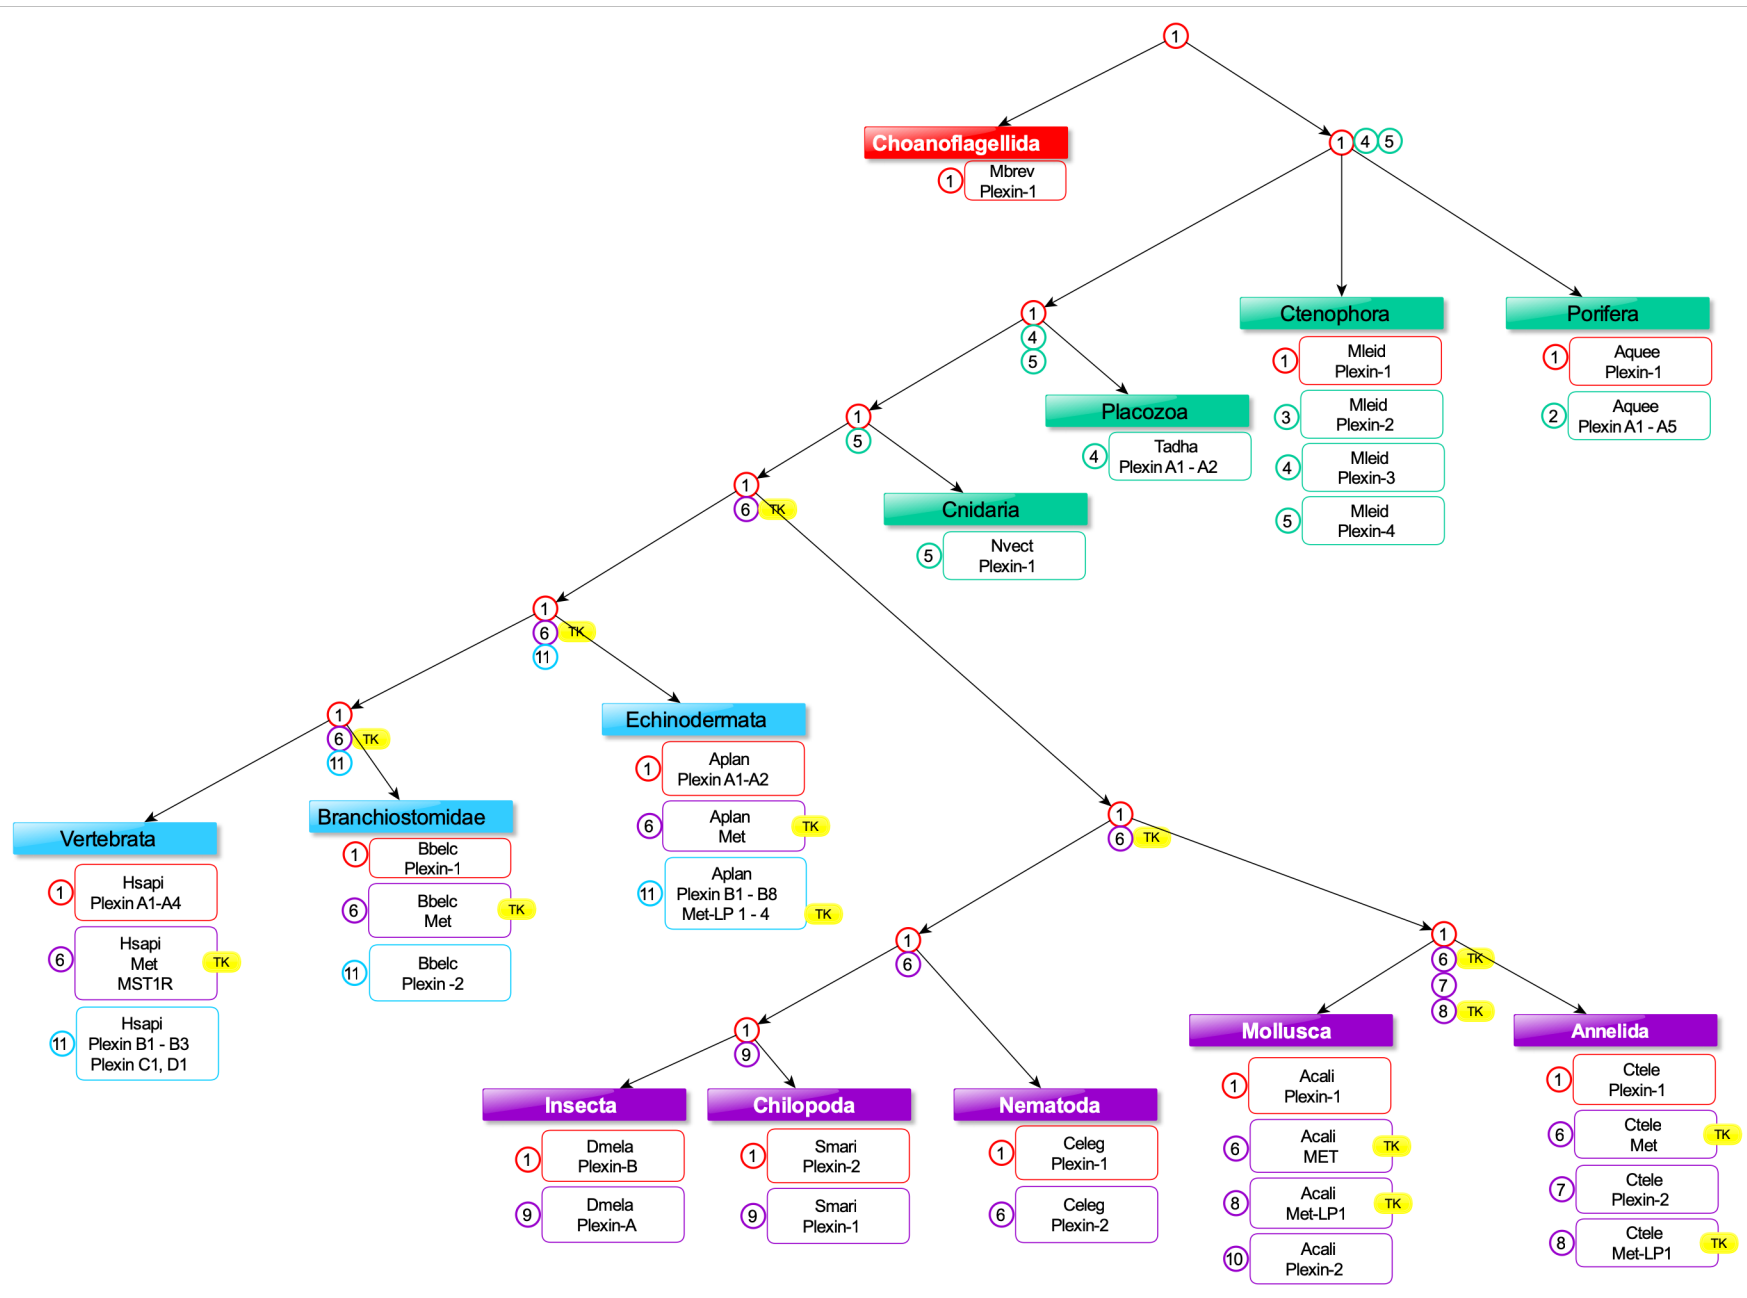



Fig. S4 B

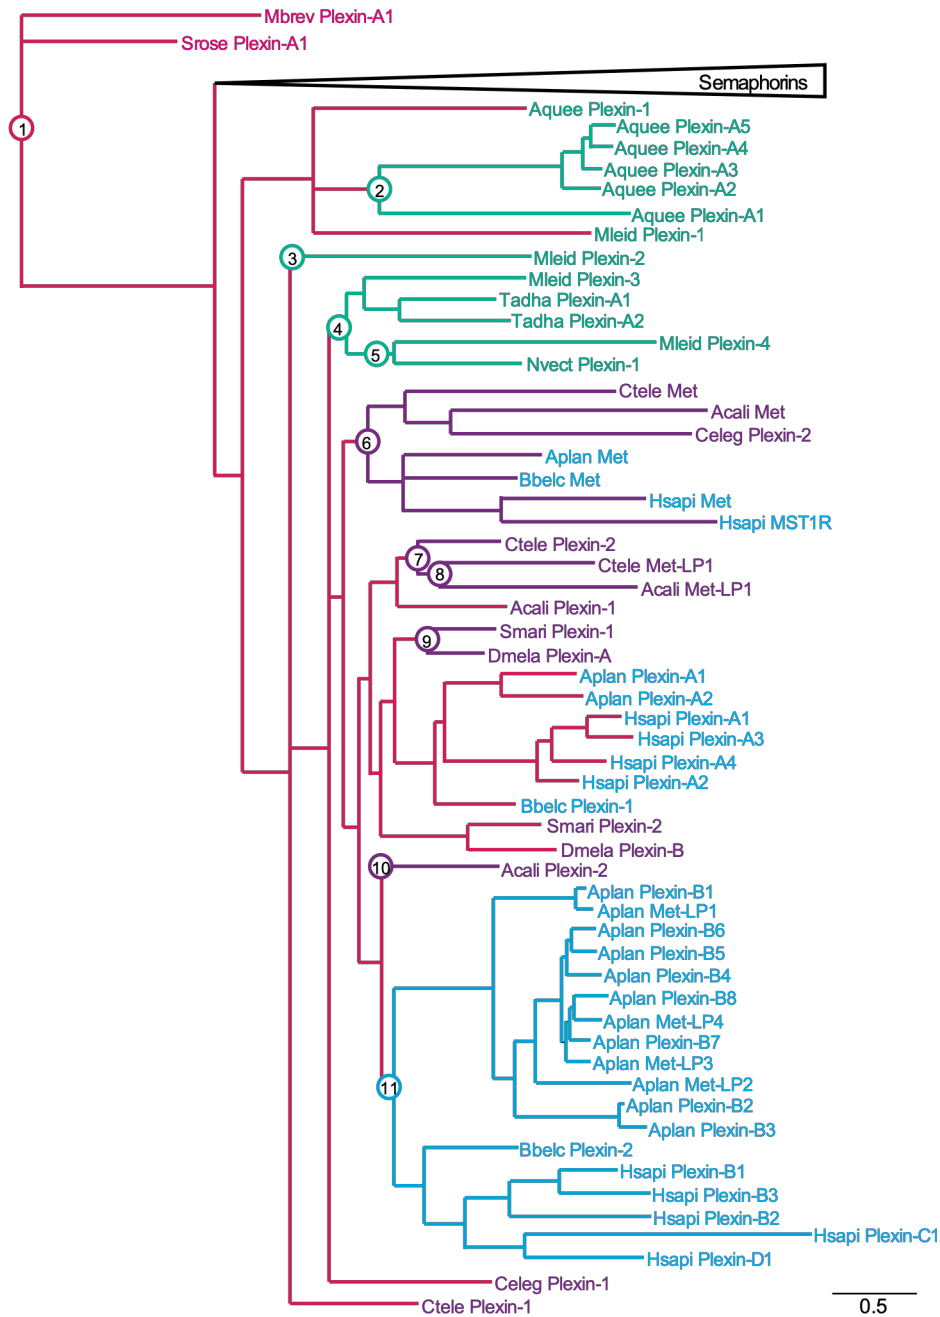

0.5

**Fig. S5 A** Model of major gene duplication events in evolution of semaphorins

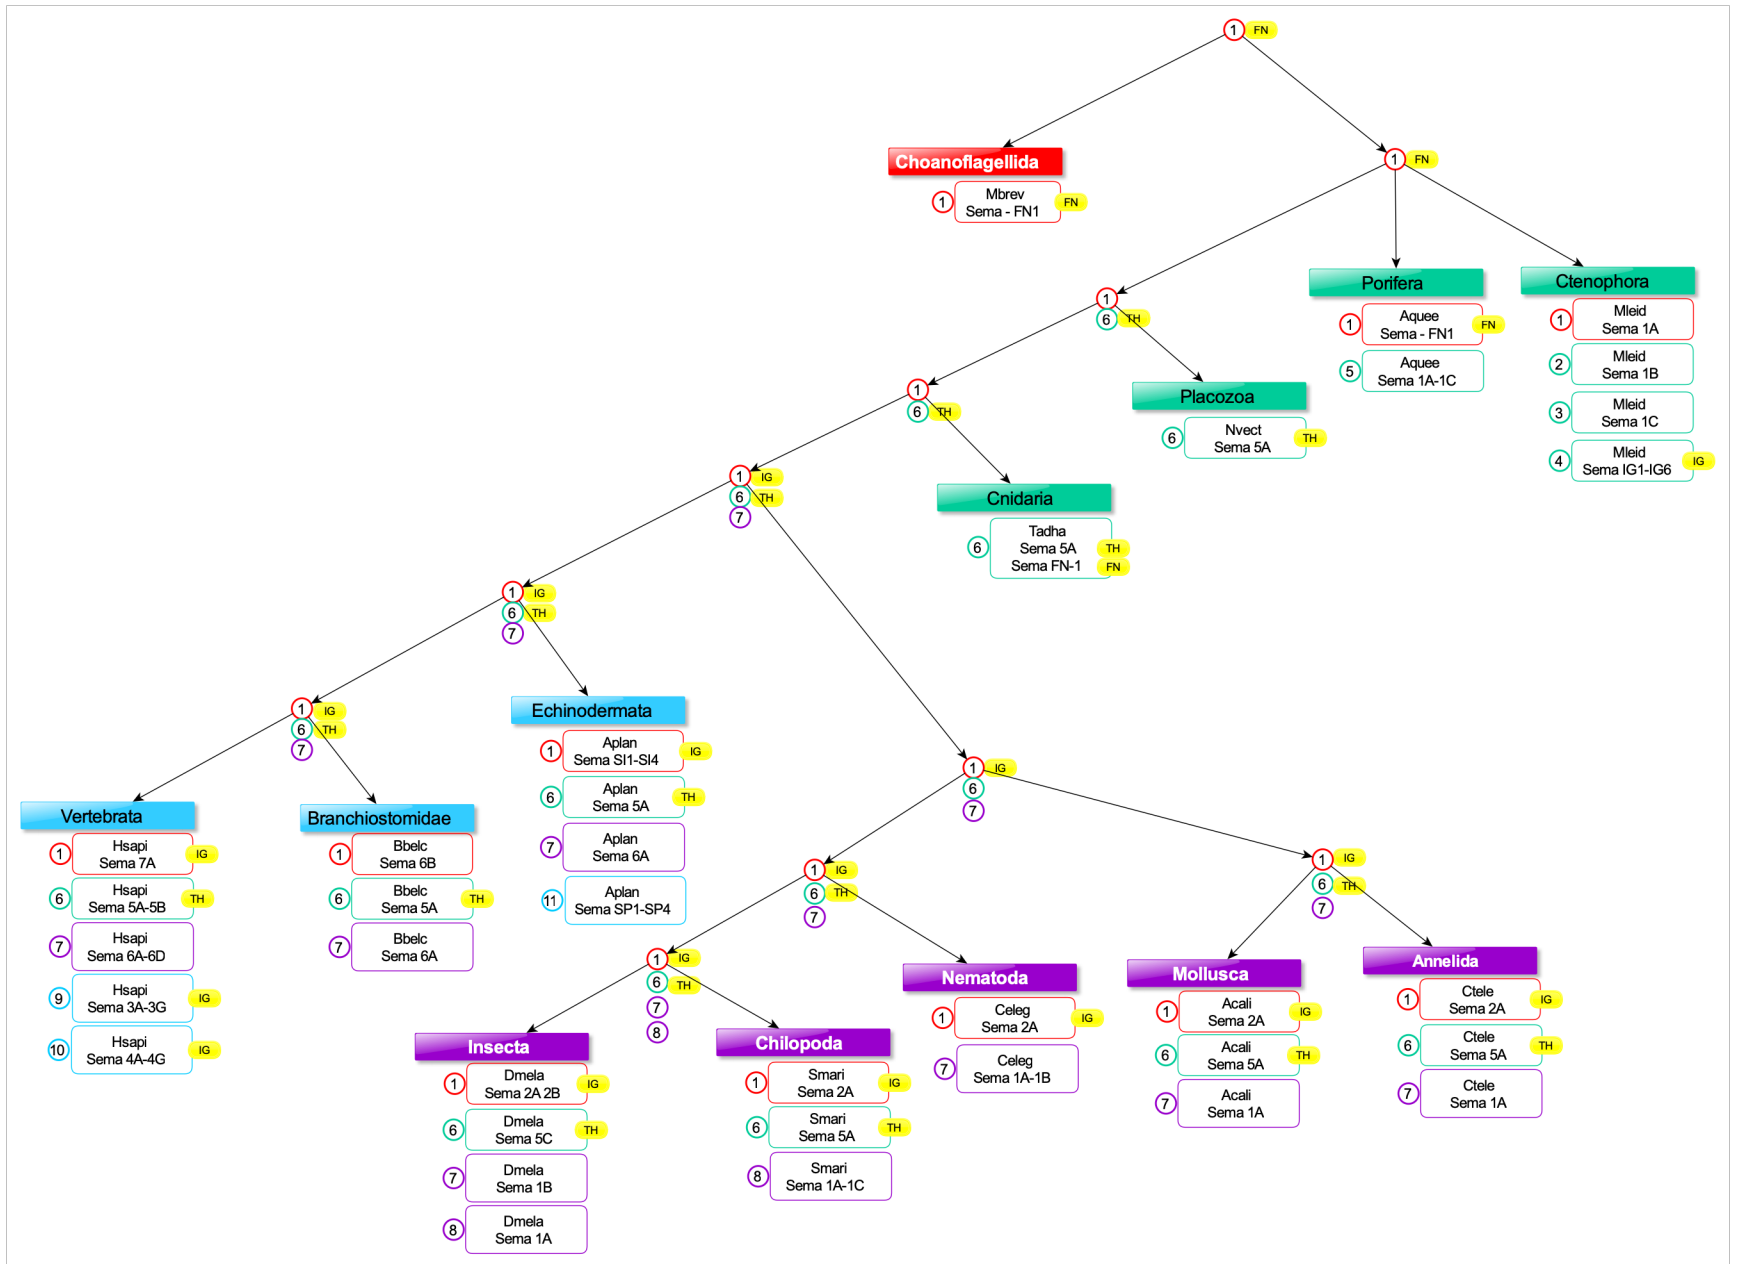

Fig. S5 B

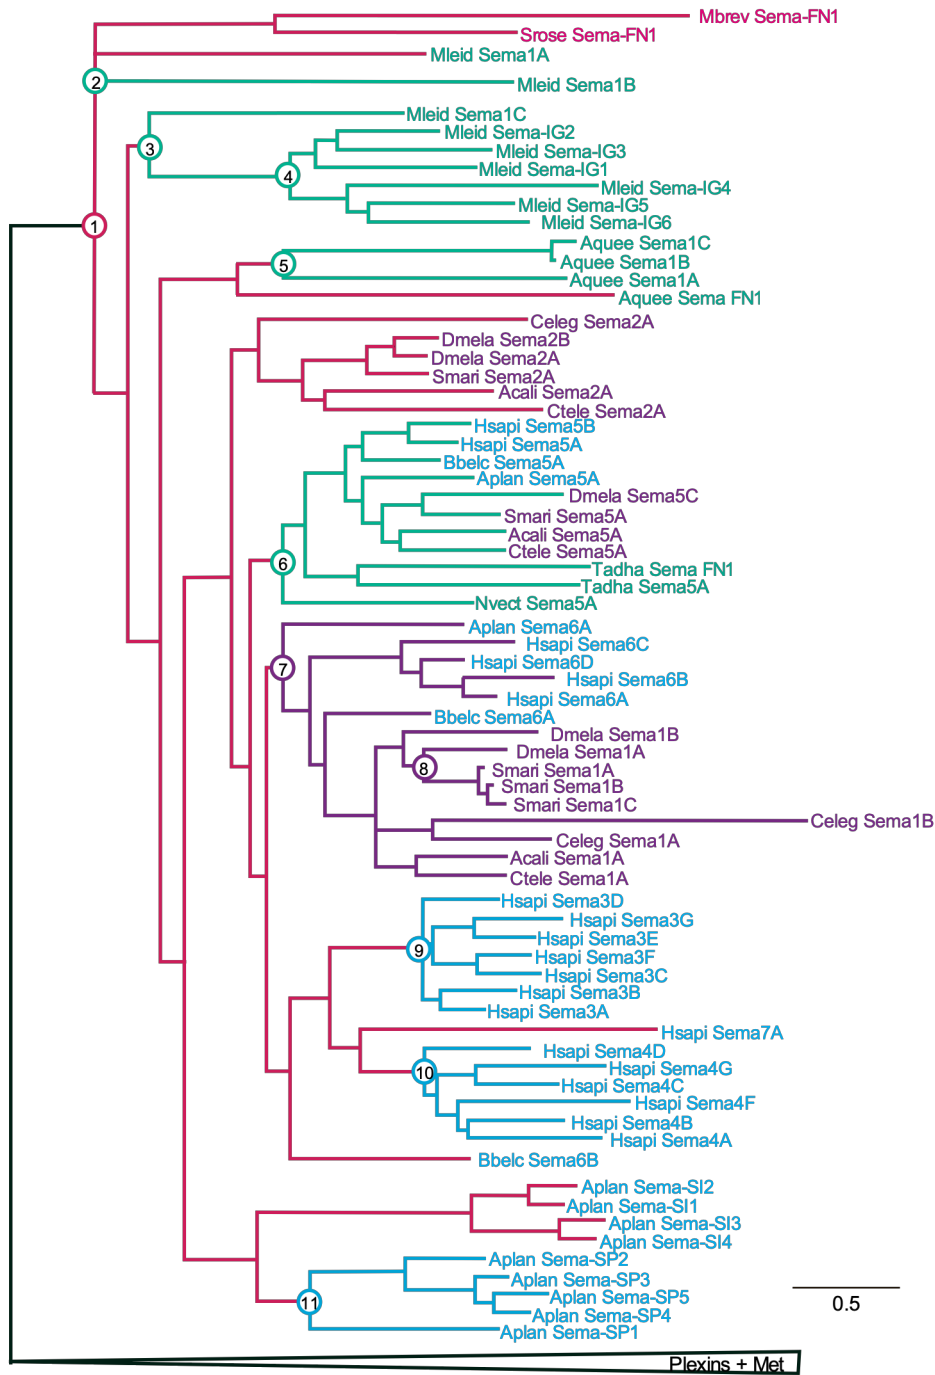

Supplement: 41598_2019_38512_MOESM1_ESM.pdf [file 41598_2019_38512_MOESM1_ESM.pdf]
